# Supplementary material for: Effects of d-alanine Intake on Amino Acid Metabolism and Kidney Function in Healthy Adults: A Multicenter, Randomized Pilot Study
Source: PubMed Central journal article supplement — Curr Dev Nutr. 2024 May 23;8(7):103787. doi: 10.1016/j.cdnut.2024.103787 (PMC11262164; doi:10.1016/j.cdnut.2024.103787), 2024-05-23
Supplement: mmc1.pdf [file mmc1.pdf]

**Supplementary Figure 1. Study design**

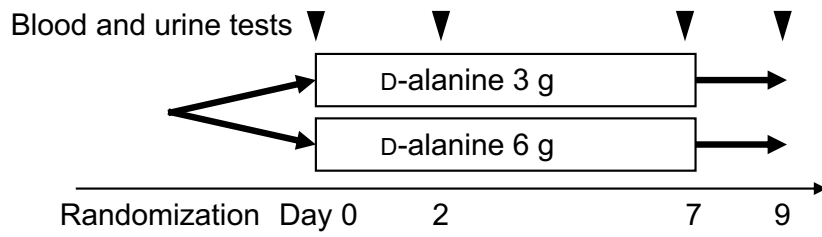

**Supplementary Figure 2. Participant disposition**

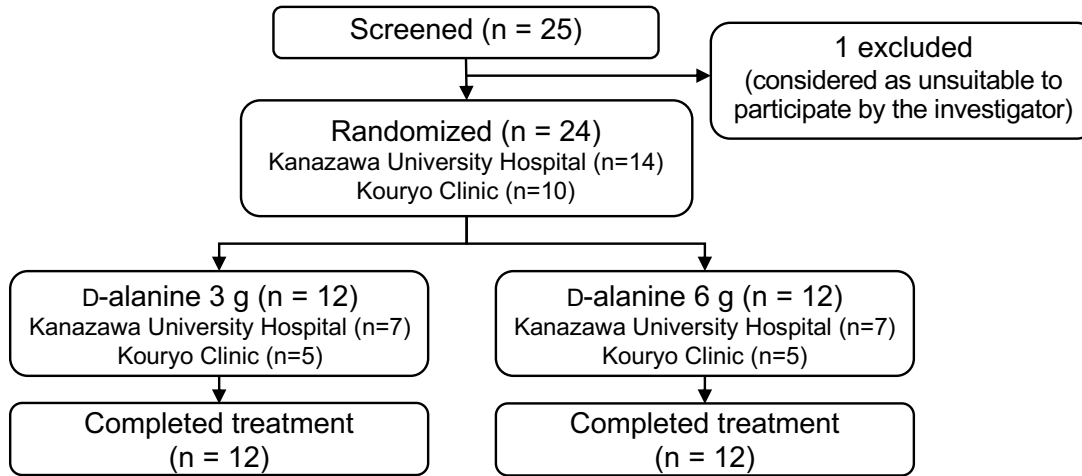

**Supplementary Figure 3. Mean plasma and urine DL-serine (A), DL-asparagine (B), and DL-proline (C) levels during follow-up in the 3 g and 6 g D-alanine groups**

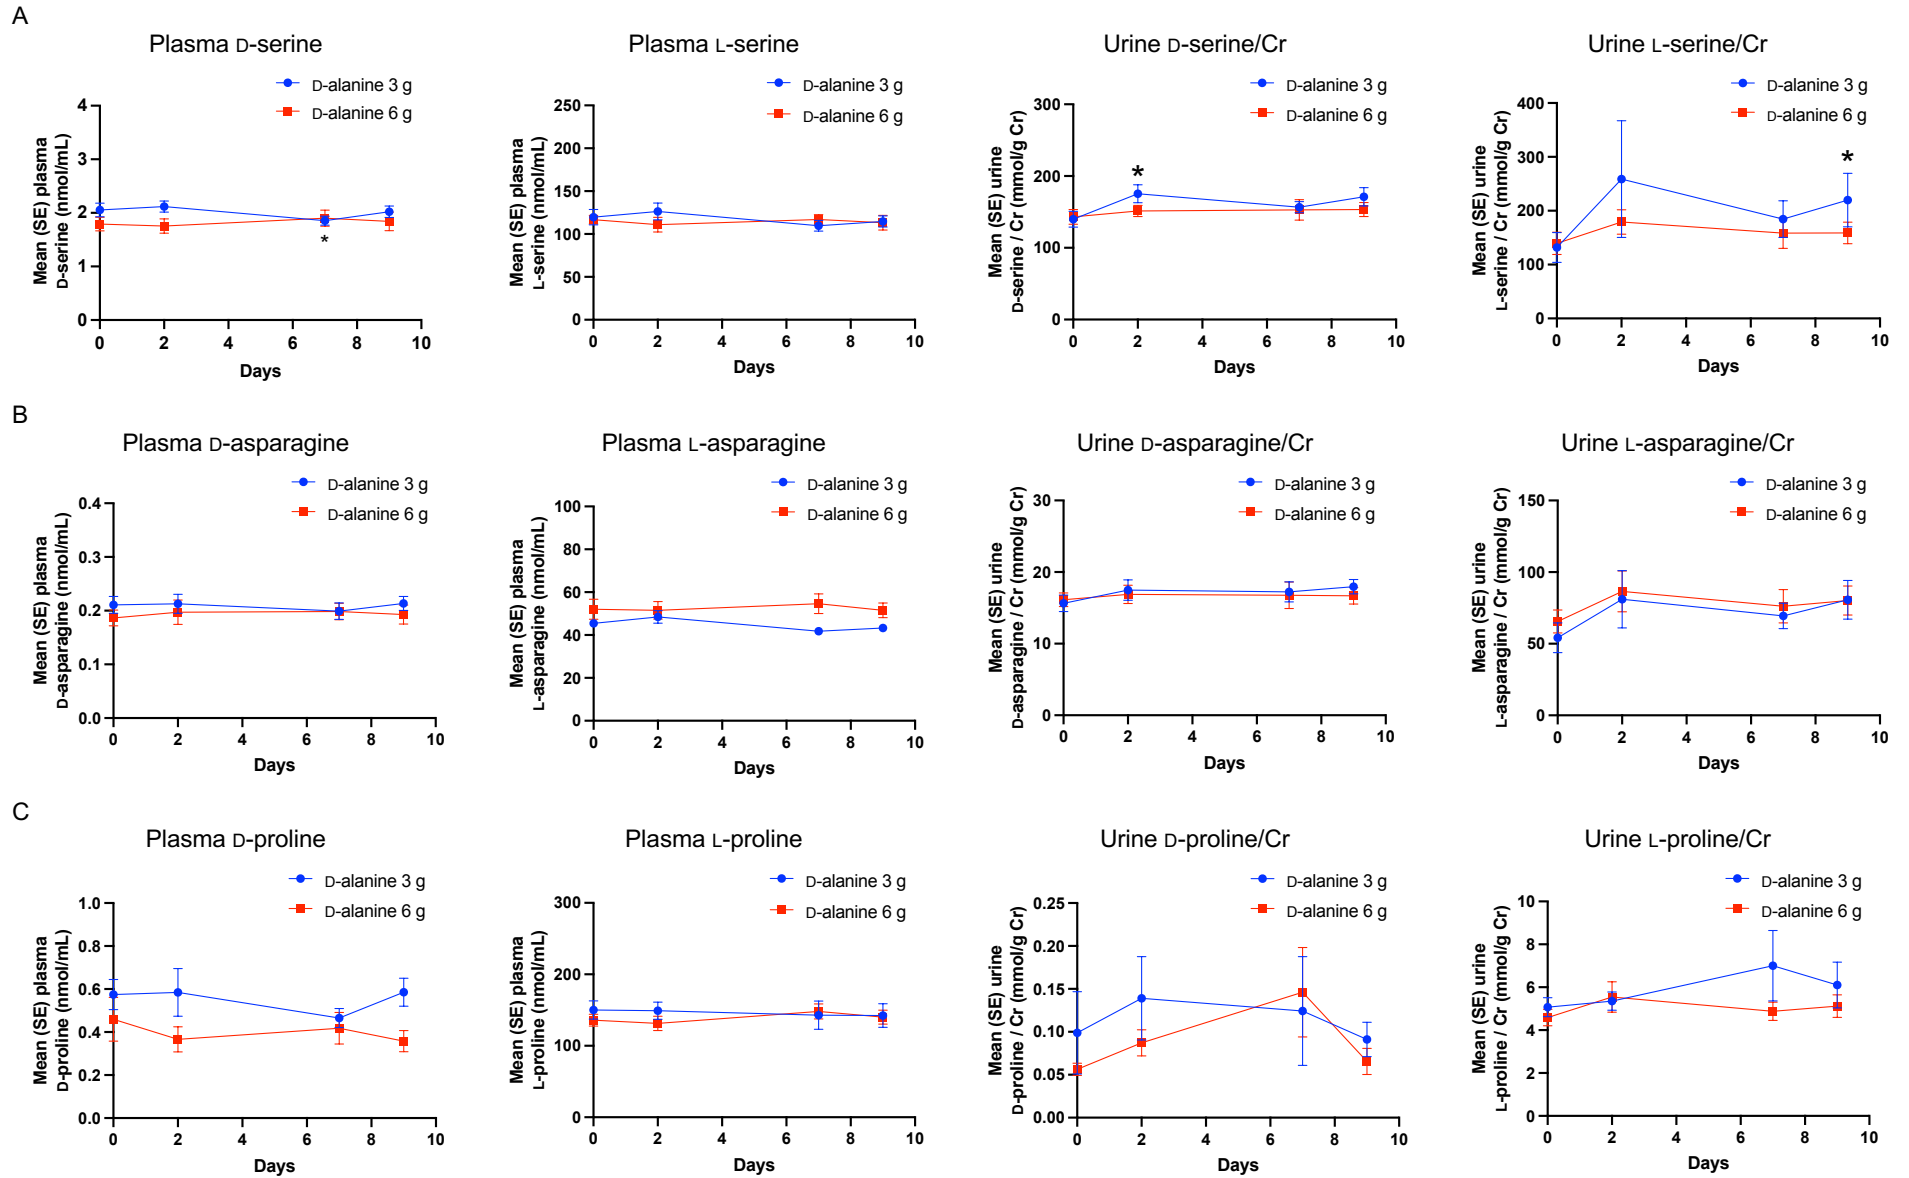

\* P < 0.05 vs. baseline value

**Supplementary Table 1. Mean changes in plasma and urine DL-amino acids levels in the 3 g and 6 g D-alanine groups**

|                             | Day | Mean (SD) change from baseline |         |                           |         |
|-----------------------------|-----|--------------------------------|---------|---------------------------|---------|
|                             |     | D-alanine 3 g<br>(n = 12)      | p       | D-alanine 6 g<br>(n = 12) | p       |
| <b>Plasma amino acid</b>    |     |                                |         |                           |         |
| D-alanine (nmol/ml)         | 2   | 126.2 (108.1)                  | 0.002   | 175.2 (82.4)              | <0.0001 |
|                             | 7   | 77.5 (34.3)                    | <0.0001 | 192.1 (80.9)              | <0.0001 |
|                             | 9   | 1.8 (1.1)                      | 0.0001  | 16.1 (39.1)               | 0.18    |
| L-alanine (nmol/ml)         | 2   | -8.3 (47.5)                    | 0.56    | -35.0 (77.4)              | 0.15    |
|                             | 7   | -18.8 (68.7)                   | 0.36    | 27.8 (78.8)               | 0.25    |
|                             | 9   | -18.4 (72.4)                   | 0.40    | 2.3 (109.7)               | 0.94    |
| D-serine (nmol/ml)          | 2   | 0.06 (0.28)                    | 0.46    | -0.04 (0.12)              | 0.31    |
|                             | 7   | -0.20 (0.25)                   | 0.02    | 0.11 (0.23)               | 0.13    |
|                             | 9   | -0.03 (0.40)                   | 0.77    | 0.05 (0.27)               | 0.53    |
| L-serine (nmol/ml)          | 2   | 6.6 (20.3)                     | 0.28    | -5.9 (20.4)               | 0.34    |
|                             | 7   | -10.0 (25.1)                   | 0.20    | 0.3 (15.2)                | 0.95    |
|                             | 9   | -5.0 (27.2)                    | 0.54    | -3.6 (24.4)               | 0.62    |
| D-asparagine (nmol/ml)      | 2   | 0.002 (0.043)                  | 0.87    | 0.011 (0.057)             | 0.53    |
|                             | 7   | -0.012 (0.039)                 | 0.31    | 0.012 (0.044)             | 0.37    |
|                             | 9   | 0.003 (0.040)                  | 0.83    | 0.006 (0.034)             | 0.52    |
| L-asparagine (nmol/ml)      | 2   | 3.0 (9.0)                      | 0.27    | -0.46 (6.2)               | 0.80    |
|                             | 7   | -3.7 (8.1)                     | 0.15    | 2.6 (7.8)                 | 0.27    |
|                             | 9   | -2.1 (9.0)                     | 0.44    | -0.45 (8.4)               | 0.86    |
| D-proline (nmol/ml)         | 2   | 0.0096 (0.24)                  | 0.89    | -0.094 (0.18)             | 0.09    |
|                             | 7   | -0.11 (0.20)                   | 0.09    | -0.042 (0.15)             | 0.36    |
|                             | 9   | 0.01 (0.31)                    | 0.90    | -0.10 (0.23)              | 0.15    |
| L-proline (nmol/ml)         | 2   | -1.1 (22.9)                    | 0.87    | -4.5 (26.7)               | 0.57    |
|                             | 7   | -7.2 (32.6)                    | 0.46    | 12.2 (31.8)               | 0.21    |
|                             | 9   | -7.9 (25.2)                    | 0.30    | 4.2 (29.1)                | 0.63    |
| <b>Urine amino acid</b>     |     |                                |         |                           |         |
| D-alanine/Cr (mmol/g Cr)    | 2   | 5407.7 (5821.1)                | 0.008   | 7451.2 (4749.2)           | 0.0002  |
|                             | 7   | 2835.6 (1409.0)                | <0.0001 | 9249.3 (7623.5)           | 0.002   |
|                             | 9   | 76.0 (80.5)                    | 0.007   | 1018.5 (3015.1)           | 0.27    |
| L-alanine/Cr (mmol/g Cr)    | 2   | 60.7 (99.5)                    | 0.06    | 21.2 (66.9)               | 0.29    |
|                             | 7   | 55.1 (83.8)                    | 0.04    | 41.7 (105.5)              | 0.20    |
|                             | 9   | 80.5 (141.0)                   | 0.07    | 20.1 (86.1)               | 0.44    |
| D-serine/Cr (mmol/g Cr)     | 2   | 35.5 (55.9)                    | 0.04    | 8.3 (18.3)                | 0.14    |
|                             | 7   | 16.8 (53.0)                    | 0.30    | 9.6 (45.7)                | 0.48    |
|                             | 9   | 31.4 (52.9)                    | 0.06    | 10.1 (29.5)               | 0.26    |
| L-serine/Cr (mmol/g Cr)     | 2   | 127.0 (343.3)                  | 0.23    | 39.4 (74.1)               | 0.09    |
|                             | 7   | 52.8 (94.4)                    | 0.08    | 18.9 (92.1)               | 0.49    |
|                             | 9   | 88.1 (133.8)                   | 0.04    | 19.1 (102.0)              | 0.53    |
| D-asparagine/Cr (mmol/g Cr) | 2   | 1.9 (6.4)                      | 0.33    | 0.73 (5.4)                | 0.65    |
|                             | 7   | 1.6 (6.1)                      | 0.38    | 0.61 (5.8)                | 0.72    |
|                             | 9   | 2.3 (6.1)                      | 0.21    | 0.54 (3.8)                | 0.63    |
| L-asparagine/Cr (mmol/g Cr) | 2   | 26.7 (70.9)                    | 0.22    | 20.9 (51.2)               | 0.18    |
|                             | 7   | 15.2 (32.6)                    | 0.14    | 10.6 (32.9)               | 0.29    |
|                             | 9   | 26.4 (41.2)                    | 0.05    | 14.6 (43.5)               | 0.27    |
| D-proline/Cr (mmol/g Cr)    | 2   | 0.04 (0.1)                     | 0.31    | 0.03 (0.06)               | 0.09    |
|                             | 7   | 0.03 (0.06)                    | 0.19    | 0.09 (0.2)                | 0.10    |
|                             | 9   | -0.008 (0.1)                   | 0.84    | 0.009 (0.05)              | 0.51    |
| L-proline/Cr (mmol/g Cr)    | 2   | 0.3 (1.1)                      | 0.37    | 1.0 (2.0)                 | 0.12    |
|                             | 7   | 1.9 (4.8)                      | 0.19    | 0.3 (1.9)                 | 0.60    |
|                             | 9   | 1.0 (2.7)                      | 0.22    | 0.5 (1.4)                 | 0.22    |

**Supplementary Table 2. Mean changes in clinical and laboratory parameters in the 3 g and 6 g D-alanine groups**

|                           | Day | Mean (SD) change from baseline |       |                           |       |
|---------------------------|-----|--------------------------------|-------|---------------------------|-------|
|                           |     | D-alanine 3 g<br>(n = 12)      | p     | D-alanine 6 g<br>(n = 12) | p     |
| Body weight (kg)          | 2   | -0.13 (0.62)                   | 0.49  | -0.07 (0.50)              | 0.63  |
|                           | 7   | 0.25 (0.57)                    | 0.16  | -0.09 (0.41)              | 0.46  |
|                           | 9   | -0.09 (0.73)                   | 0.67  | 0.03 (0.44)               | 0.81  |
| AST (U/L)                 | 2   | -0.1 (6.2)                     | 0.96  | -0.9 (2.0)                | 0.14  |
|                           | 7   | 1.5 (13.4)                     | 0.71  | 0.2 (1.8)                 | 0.75  |
|                           | 9   | 13.8 (54.0)                    | 0.40  | 0.5 (3.9)                 | 0.67  |
| ALT (U/L)                 | 2   | -0.1 (6.3)                     | 0.96  | -0.9 (2.2)                | 0.18  |
|                           | 7   | -2.0 (6.1)                     | 0.28  | -0.8 (2.4)                | 0.30  |
|                           | 9   | 0.2 (12.6)                     | 0.96  | -0.4 (2.6)                | 0.59  |
| Uric acid (mg/dL)         | 2   | -0.5 (0.5)                     | 0.007 | -0.4 (0.6)                | 0.049 |
|                           | 7   | -0.6 (1.0)                     | 0.06  | -0.5 (0.7)                | 0.04  |
|                           | 9   | -0.6 (0.7)                     | 0.01  | -0.4 (0.4)                | 0.01  |
| Total cholesterol (mg/dL) | 2   | -6.3 (14.9)                    | 0.17  | 0.2 (8.5)                 | 0.95  |
|                           | 7   | -12.0 (23.8)                   | 0.11  | 1.1 (12.5)                | 0.77  |
|                           | 9   | -8.1 (23.5)                    | 0.26  | -2.1 (10.8)               | 0.52  |
| HDL-cholesterol (mg/dL)   | 2   | -2.1 (5.6)                     | 0.22  | -0.2 (4.6)                | 0.90  |
|                           | 7   | -2.8 (6.2)                     | 0.16  | -1.7 (4.9)                | 0.27  |
|                           | 9   | -2.4 (8.0)                     | 0.32  | -2.6 (5.4)                | 0.13  |
| Triglycerides (mg/dL)     | 2   | -26.8 (30.5)                   | 0.01  | 17.8 (64.9)               | 0.36  |
|                           | 7   | 3.7 (99.8)                     | 0.90  | 3.0 (18.2)                | 0.58  |
|                           | 9   | 10.5 (102.9)                   | 0.73  | 28.0 (88.2)               | 0.29  |

Abbreviations; AST, aspartate aminotransferase; ALT, alanine aminotransferase; HDL, high density lipoprotein.
